# Supplementary material
Source: PubMed Central journal article supplement (PMC4064592)
Supplement: NIHMS589048-supplement-supplement_1.pdf [file NIHMS589048-supplement-supplement_1.pdf]

# 1 Supplemental Methods

## 2 Qualitative and real-time quantitative PCR

3 DNA was extracted from up to 200  $\mu$ l aliquots of ocular fluid samples using the NucliSens nucleic acid  
4 isolation kit as recommended by the manufacturer (BioMerieux) and all samples were eluted with 50  $\mu$ l of  
5 elution buffer. Real-time PCR was performed using the LightCycler (LC) 1.2 instrument (Roche  
6 Diagnostics) in a 20  $\mu$ l reaction consisting of 1X LC FastStart DNA Master HybProbe mixture containing  
7 FastStart Taq polymerase, reaction buffer dNTP mix (with dUTP substituted for dTTP), and 1.0 mM  
8  $MgCl_2$  (Roche), an additional 3.0 mM  $MgCl_2$ , 0.5  $\mu$ M of each primer, 0.2  $\mu$ M of each FRET probe, 1 U  
9 uracil-DNA-glycosylase (UNG), and 10  $\mu$ l of extracted DNA. The reaction mixture was preincubated for  
10 10 min at 30° C to activate UNG and DNA was denatured and UNG inactivated at 95° C for 10 min. The  
11 template was first amplified using step-down PCR which consisted of 12 cycles of 5 sec at 95° C, 10 sec at  
12 66° C to 55° C with a 1° C decrease in annealing temperature at each cycle, and 20 sec at 72° C. This was  
13 then followed by an additional 34 cycles of 5 sec at 95° C, 10 sec at 54° C, and 20 sec at 72° C. Separate  
14 PCR amplifications were performed for detection of CMV, HSV-1, HSV-2, and VZV (Supplemental Table  
15 1). Prior to extraction, each sample was spiked with an internal control (pBR322 plasmid DNA) to verify  
16 successful recovery of DNA and removal of PCR inhibitors. The internal control in extracted samples was  
17 detected by amplification in a separate qualitative LC real-time PCR as described previously (Cohen et al,  
18 Human Herpesvirus 6-A, 6-B, and 7 in vitreous fluid samples. *J Med Virology* 2010; 82: 996-9).

19 For determination of quantitative values, a separate plasmid that contained the amplification site  
20 for each virus was generated by cloning the target region into the pCR2.1 vector (Invitrogen). After  
21 propagation and purification of each plasmid, the concentration was calculated using the absorbance at 260  
22 nm and the plasmid molecular weight. The plasmids were linearized and then diluted in TRIS-EDTA (TE)  
23 buffer (pH 8.0) with glycogen (33.3  $\mu$ g/mL), to obtain a ten-fold dilution series for the generation of the  
24 standard curves. For each positive sample, the LC software plotted the crossing threshold value on this  
25 curve to determine the number of target copies present in the amplification reaction. This value was then  
26 expressed as copies/mL based on the volume of specimen extracted and the quantity of extracted DNA  
27 added to the reaction.

## 29 Direct sequencing of CMV genome for genotypic antiviral drug resistance

30 Patients who developed CMV reactivation while on prophylactic valganciclovir therapy were evaluated for  
31 resistance mutations using PCR-amplified DNA. Following the isolation of CMV DNA from aqueous fluid  
32 (as described above), sequencing of the UL97 gene encoding phosphotransferase and the UL54 gene  
33 encoding DNA polymerase was performed. Two separate amplification reactions consisting of overlapping  
34 primers were used to amplify a region of approximately 650-bp (codons 426 – 638) of the UL97 gene and  
35 then approximately 2400-bp of the UL54 gene (codons 280 – 1085) were amplified using five separate  
36 amplification reactions. PCR amplification was performed on the LC 1.2 instrument and each reaction  
37 consisted of 1X LC FastStart DNA Master HybProbe mixture, 0.5  $\mu$ M of the appropriate forward and  
38 reverse primers (Supplemental Table 2), 0.5 U UNG, and 10  $\mu$ l of extracted DNA in a final volume of 20  
39  $\mu$ l. The reaction mixture was preincubated for 10 min at 30° C and the template amplification consisted of  
40 45 cycles of 5 sec at 95° C, 10 sec at 65° C and 20 sec at 72° C. Following amplification, each 20- $\mu$ l  
41 reaction was electrophoresed on a 1% GTG gel and the appropriately sized band for each reaction  
42 (Supplemental Table 2) was excised from the gel and the DNA purified using the QIAquick Gel Extraction  
43 kit as recommended by the manufacturer (QIAGEN). Cycle sequencing was performed using the  
44 appropriate forward and reverse primers used for amplification and all reactions were performed with the  
45 ABI Prism BigDye Terminator Cycle Sequencing kit (Applied Biosystems). Excess dye terminators were  
46 removed using the Agencourt CleanSEQ Dye-Terminator reagent (Beckman Coulter) according to  
47 guidelines recommended by the manufacturer. Fluorescence-based sequence analysis of the extension  
48 products was performed with the ABI 3100 Genetic Analyzer (Applied Biosystems) and sequences were  
49 assembled using the SeqMan Pro software (DNASTAR, Inc.). For detection of drug-conferring mutations,  
50 the determined nucleotide sequences from each gene were submitted to the University of Ulm's HCMV  
51 drug resistance mutations web-based search tool that links the sequence to a database containing all  
52 published UL97 and UL54 mutations.<sup>3</sup>  
53

1  
2  
3

**Supplemental Table 1. Primer and probe sequences, product size, and target DNA for each herpes virus PCR assay**

| Assay                             | Sequence                                          | Product size (bp) | Gene target    |
|-----------------------------------|---------------------------------------------------|-------------------|----------------|
| Cytomegalovirus                   |                                                   |                   |                |
| CMV.FOR primer                    | 5'-GCCGACGGGACCACCGTGACG-3'                       | 206               | Glycoprotein B |
| CMV.REV primer                    | 5'-GCTCGCTGCTCTGCGTCCAGAC-3'                      |                   |                |
| CMV.FRET.up probe                 | 5'-GTGTTTATAATTCTGGTCGCAAAGGAC-Fluor.-3'          |                   |                |
| CMV.FRET.dn probe                 | 5'-Red640-GGGACCACCGTCGTCTGATGCA-Phos.-3'         |                   |                |
| Herpes virus 1 and 2 <sup>a</sup> |                                                   |                   |                |
| HSV.FOR primer                    | 5'-GGACGACCACGAGACCGACATG-3'                      | 288               | Glycoprotein B |
| HSV.REV primer                    | 5'-TGCTTGAAGCGGTCGGCGGCG-3'                       |                   |                |
| HSV1.FRET.up probe                | 5'-GAGGTCGGTGGTGTGCCAGCCCC-Fluor.-3'              |                   |                |
| HSV1.FRET.dn probe                | 5'-Red640-TCGTGCGGGTCGCGGCGTTGGC-Phos.-3'         |                   |                |
| HSV2.FRET.up probe                | 5'-GTGGTGTGCCACCCCGGCTCGT-Fluor.-3'               |                   |                |
| HSV2.FRET.dn probe                | 5'-Red640-CGTGGCGACCTTCGCCGGCTTGA-Phos.-3'        |                   |                |
| Varicella-zoster virus            |                                                   |                   |                |
| VZV.FOR primer                    | 5'-CGGTGCGAACACGGGAGTATCCTCG-3'                   | 267               | Glycoprotein B |
| VZV.REV primer                    | 5'-ATCCCTTTGCCGAGAAACCCAACGC-3'                   |                   |                |
| VZV.FRET.up probe                 | 5'-CAGATACTAACGTCATATATTTAATCATTTTC-Fluor.-3'     |                   |                |
| VZV.FRET.dn probe                 | 5'-Red640-TGGGCTTCTCGAAATTTATCGGGATCAAAC-Phos.-3' |                   |                |

4  
5  
6  
7  
8  
9

<sup>a</sup> Same forward and reverse primers used for both the HSV-1 and HSV-2 PCR assays.
